# Supplementary material
Source: PubMed Central journal article supplement (PMC5956245)
Supplement: fj.201701250R.sf1.pdf [file fj.201701250R.sf1.pdf]

## SUPPORTING INFORMATION

### *Optimization of light exposure in male and female mice*

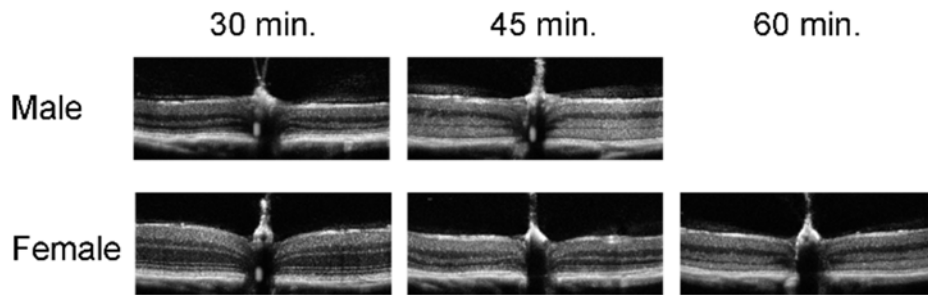

**SI Figure 1.** Light exposure times required to produce retinal degeneration in DMSO-injected control *Abca4<sup>-/-</sup>Rdh8<sup>-/-</sup>* double knockout mice under 10,000 lux white light.
