# Supplementary material
Source: PubMed Central journal article supplement (PMC5956245)
Supplement: fj.201701250R.sf2.pdf [file fj.201701250R.sf2.pdf]

## *Dose determination*

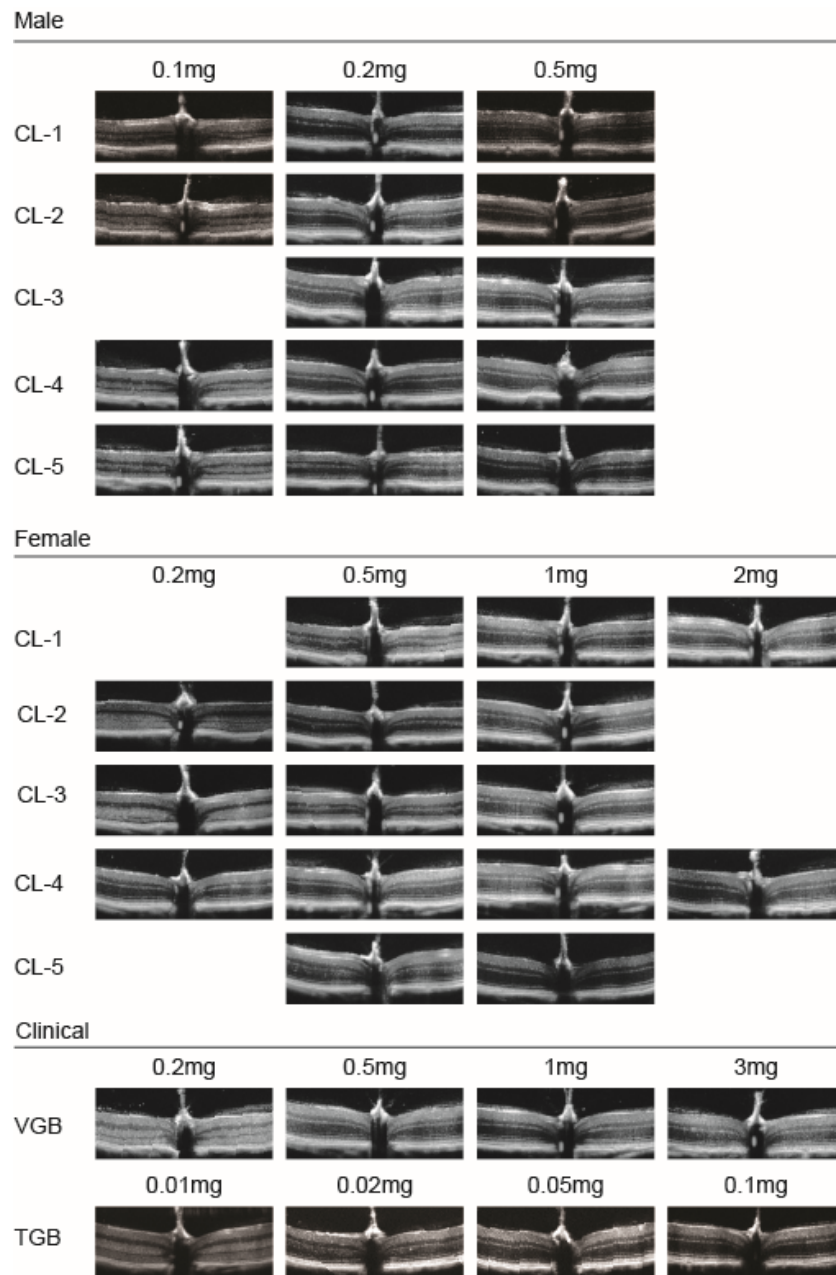

**SI Figure 2.** Determination of minimum effective dose of each compound required to protect the retina from degeneration.
